# Supplementary material
Source: PubMed Central journal article supplement (PMC7062478)
Supplement: Dixon-Woods_Supp_App.pdf [file Dixon-Woods_Supp_App.pdf]

Supplemental materials for:

Sinnott C, Georgiadis A, Park J, Dixon-Woods M. Impacts of operational failures on primary care physicians' work: a critical interpretive synthesis of the literature. *Ann Fam Med.* 2020;18(2):159-168.

# Supplementary Appendix 1

## Contents

- 1.1 Search protocol for “Impacts of Operational Failures on Primary Care Physicians’ work: A Critical Interpretive Synthesis of the literature” ..... 2
- 1.2 Table A1. Databases searched ..... 7
- 1.3 Table A2. Criteria used to judge quality of included papers ..... 8
- 1.4 Table A3: data extraction template ..... 9
- 1.5 Table A4. Studies included in review ..... 11
- 1.6 References ..... 30

## 1.1 Search protocol for “Impacts of Operational Failures on Primary Care Physicians’ work: A Critical Interpretive Synthesis of the literature”

Search terms used in following databases, from database inception until October 17<sup>th</sup> 2017:

A. PUBMED

B. CINAHL

C. EMBASE

D. PsycINFO

E. British Nursing Index

F. Health Business Elite

G. Healthcare Management Information Consortium (HMIC)

A. PUBMED

I = ambulatory care[title/abstract] OR general pract\*[title/abstract] OR primary health care[title/abstract] OR primary care[title/abstract] OR family pract\*[title/abstract] OR family medicine[title/abstract] OR family physician[title/abstract] OR “general practice” [MeSH Terms]

II = time-motion [title/abstract] OR (time[title/abstract] AND motion[title/abstract]) OR organizational efficiency[title/abstract] OR organisational efficiency [title/abstract] OR work\*flow[title/abstract] OR “Task Performance and Analysis”[MeSH Terms] OR “Efficiency, Organizational” [MESH TERMS]

III = disrupt\*[TITLE/ABSTRACT] OR interrupt\*[TITLE/ABSTRACT] OR systems engineer\*[TITLE/ABSTRACT] OR operational failure\*[title/abstract] OR equipment failure\* [TITLE/ABSTRACT] OR medical error\* [TITLE/ABSTRACT] OR “medical errors” [MeSH Terms] OR “equipment failures” [MeSH Terms]

IV = I AND III

V: I AND II

VI: IV OR V

## B. CINAHL

I = ((MM "primary health care")) OR ((MM "Family Practice")) OR ((MH "Physicians, Family")) OR (TI ("general pract\* OR "primary health care" OR "primary care" OR "primary care physician\* OR "family pract\* or “family medicine” or “family physician\* OR “ambulatory care”)) OR (AB ("general pract\* OR "primary health care" OR "primary care" OR "primary care physician\* OR "family pract\* or “family medicine” or “family physician\* OR “ambulatory care”))

II = ((MM " Task Performance and Analysis")) OR ((MM "Systems Analysis")) OR ((MH " Health Services Administration")) OR (TI ("time motion" OR "time AND motion" OR "time and motion stud\* OR "organizational efficiency” OR "organisational efficiency” or “workflow”) OR (AB ("time motion" OR "time AND motion" OR "time and motion stud\* OR "organizational efficiency” OR "organisational efficiency” or “workflow”))

III = ((MM " equipment failure")) OR (TI ("disrupt\* OR "interrupt\* OR "systems engineer\* OR "operational failure\* OR (AB ("disrupt\* OR "interrupt\* OR "systems engineer\* OR "operational failure\*)))

IV = I AND III

V = I AND II

VI = IV OR V

## C. EMBASE

I (ambulatory care or general pract\* or primary health care or primary care or family pract\* or family medicine or family physician).ab. or (ambulatory care or general pract\* or primary health care or primary care or family pract\* or family medicine or family physician).ti. or (family practice or family physicians or general practice or general practitioners or primary health care or family medicine).sh.

II: (disrupt\* or interrupt\* or systems engineer\* or operational failure\* or equipment failure\* or medical error\* time-motion or (time and motion) or organizational efficiency or organisational efficiency or work\*flow).ab. or (disrupt\* or interrupt\* or systems engineer\* or operational failure\* or equipment failure\* or medical error\* time-motion or (time and motion) or organizational efficiency or organisational efficiency or work\*flow).ti.

or (efficiency, organizational or health services administration or task performance & analysis or task performance or patient care management).sh.

III = (time-motion or (time and motion) or organizational efficiency or organisational efficiency or work\*flow).ab. or (time-motion or (time and motion) or organizational efficiency or organisational efficiency or work\*flow).ti. or (equipment failure analysis or equipment failure or diagnostic errors or errors & omissions or medical error).sh.

IV = I and III

V= I AND II

VI= IV OR V

#### D. PsycINFO

I: ab("ambulatory care" or "general pract\*" or "primary health care" or "primary care" or "family pract\*" or "family medicine" or "family physician" ) OR ti("ambulatory care" or "general pract\*" or "primary health care" or "primary care" or "family pract\*" or "family medicine" or "family physician" ) OR su("family practice" OR "family physicians" OR "general practice" OR "general practitioners" OR "primary health care" OR "family medicine")

II: (ab("time-motion" OR (time AND motion) OR "organizational efficiency" OR "organisational efficiency" OR work\*flow) OR ti("time-motion" OR (time AND motion) OR "organizational efficiency" OR "organisational efficiency" OR work\*flow)) OR su("task performance and analysis" OR "efficiency, organizational" OR "health services administration" OR "patient care management" OR "systems analysis") OR cl("Organizational Behavior")

III = (ab("disrupt\*" OR "interrupt\*" OR "systems engineer\*" OR "operational failure\*" OR "equipment failure\*" OR "medical error\*") OR ti("disrupt\*" OR "interrupt\*" OR "systems engineer\*" OR "operational failure\*" OR "equipment failure\*" OR "medical error\*")) OR su("equipment failure analysis" OR "equipment failure" OR "diagnostic errors" OR "errors")

IV = I and III

V= I AND II

VI= IV OR V

## E. British Nursing Index

I: (ti("ambulatory care" OR "general pract\*" OR "primary health care" OR "primary care" OR "family pract\*" OR "family medicine" OR "family physician") OR ab("ambulatory care" OR "general pract\*" OR "primary health care" OR "primary care" OR "family pract\*" OR "family medicine" OR "family physician")) OR su("primary health care professionals" OR "general practice" OR "general practitioners" OR "primary care" OR "primary health care" OR "general practice")

II: ab("time-motion" or (time and motion) or "organizational efficiency" or "organisational efficiency" or work\*flow ) OR ti("time-motion" or (time and motion) or "organizational efficiency" or "organisational efficiency" or work\*flow ) OR su("efficiency, organizational" OR "health services administration" OR "task performance & analysis" OR "task performance" OR "patient care management")

III = ab("disrupt\*" OR "interrupt\*" OR "systems engineer\*" OR "operational failure\*" OR "equipment failure\*" OR "medical error\*") OR ti("disrupt\*" OR "interrupt\*" OR "systems engineer\*" OR "operational failure\*" OR "equipment failure\*" OR "medical error\*") OR su("equipment failure analysis" OR "equipment failure" OR "diagnostic errors" OR "error analysis" OR "failure" OR "errors & omissions" OR "human error" OR "errors")

IV = I and III

V= I AND II

VI= IV OR V

## F. Health Business Elite

I: AB ( "ambulatory care" or "general pract\*" or "primary health care" or "primary care" or "family pract\*" or "family medicine" or "family physician" ) OR TI ( "ambulatory care" or "general pract\*" or "primary health care" or "primary care" or "family pract\*" or "family medicine" or "family physician" ) OR SU ( general practice or primary care )

II: TI ( "time-motion" or (time and motion) or "organizational efficiency" or "organisational efficiency" or work\*flow ) OR AB ( "time-motion" or (time and motion) or "organizational efficiency" or "organisational efficiency" or work\*flow ) OR SU ( "Task Performance and Analysis" OR "Health Services Administration" OR "Patient Care Management" )

III = AB ( "disrupt\*" OR "interrupt\*" OR "systems engineer\*" OR "operational failure\*" ) OR TI ( "disrupt\*" OR "interrupt\*" OR "systems engineer\*" OR "operational failure\*" ) OR SU ( "equipment failure\*" OR "medical error\*" )

IV = I and III

V= I AND II

VI= IV OR V

#### G. Healthcare Management Information Consortium (HMIC)

I: ("ambulatory care" OR "general pract\*" OR "primary health care" OR "primary care" OR "family pract\*" OR "family medicine" OR "family physician").ti,ab OR ("general practice" OR "primary care").sh

II. ("time-motion" OR (time AND motion) OR "organizational efficiency" OR "organisational efficiency" OR work\*flow).ti,ab OR ("Task Performance and Analysis" OR "Health Services Administration" OR "Patient Care Management" OR "organizational efficiency" OR "Efficiency, Organizational").cl,sh

III. ("Task Performance and Analysis" OR "Health Services Administration" OR "Patient Care Management" OR "organizational efficiency" OR "Efficiency, Organizational").cl,sh

IV: ("disrupt\*" OR "interrupt\*" OR "systems engineer\*" OR "operational failure\*" OR "equipment failure\*" OR "medical error\*").ti,ab OR ("medical errors" OR "equipment failures").sh

V: I AND III

VI: I AND II

VII: V OR VI

Opengrey literature search using terms “operational failures” and “primary care”.

## 1.2 Table A1. Databases searched

---

| <b>Resource</b>                                                                            | <b>Dates</b>    |
|--------------------------------------------------------------------------------------------|-----------------|
| <b>EMBASE (via OVID)</b>                                                                   | 1974 - Oct 2017 |
| <b>Cumulative Index to Nursing and Allied Health Literature with Full Text (via EBSCO)</b> | 1981 – Oct 2017 |
| <b>PsycINFO</b>                                                                            | 1887 – Oct 2017 |
| <b>Medline (via Pubmed)</b>                                                                | 1946 – Oct 2017 |
| <b>British Nursing Index (via ProQuest)</b>                                                | 1992- Oct 2017  |
| <b>Health Business Elite (via EBSCO)</b>                                                   | 1922- Oct 2017  |
| <b>Health Management Information Consortium (via Ovid)</b>                                 | 1979- Oct 2017  |
| <b>Opengrey (via opengrey.eu)</b>                                                          | 1922 – Oct 2017 |

---

### 1.3 Table A2. Criteria used to judge quality of included papers

---

1. Are the aims and objectives of the research clearly stated?
  2. Is the research design clearly specified and appropriate for the aims and objectives of the research?
  3. Do the researchers provide a clear account of the process by which their findings were produced?
  4. Do the researchers display enough data to support their interpretations and conclusions?
  5. Is the method of analysis appropriate and adequately explicated?
-



## 1.4 Table A3: data extraction template

|                                                                                        |  |
|----------------------------------------------------------------------------------------|--|
| Authors                                                                                |  |
| Year of publication                                                                    |  |
| Country                                                                                |  |
| Stated aim/objectives                                                                  |  |
| Qualitative or quantitative                                                            |  |
| Study design                                                                           |  |
| Study setting                                                                          |  |
| Participants- profession                                                               |  |
| Participants-number                                                                    |  |
| Key results (quantitative and qualitative)                                             |  |
| What operational failures identified or apparent in results                            |  |
| Evidence of impact of operational failures on primary care professionals in this study |  |



## 1.5 Table A4. Studies included in review

| First author, Year                 | Country | Aim (s)                                                                                                                                | Study design                                                                                                                                    | Study setting and participants                                                                                | Source of operational failure     | Impact of operational failures on primary care physicians, evident in the included papers |
|------------------------------------|---------|----------------------------------------------------------------------------------------------------------------------------------------|-------------------------------------------------------------------------------------------------------------------------------------------------|---------------------------------------------------------------------------------------------------------------|-----------------------------------|-------------------------------------------------------------------------------------------|
| <b>Curry 2011</b> <sup>1</sup>     | Canada  | To examine if physicians incorporate decision-support technology into their clinical routines and follow clinical advice when provided | Quantitative: assessment of adherence to clinical guidelines for diagnostic imaging and acceptance of electronic decision support over 36 weeks | Primary care physicians (n= 15 – 19 at any one time) in a rural community family practice clinic              | Computer decision support systems | Consumed time; disruption                                                                 |
| <b>Feldstein 2004</b> <sup>2</sup> | US      | To develop and evaluate medication safety alerts and processes for educating prescribers about the alerts                              | Qualitative: interviews                                                                                                                         | Primary care prescribers (n=20) in one group-model health maintenance organization                            | Computer decision support systems | Frustration; consumed time; cognitive burden                                              |
| <b>Gaikwad 2007</b> <sup>3</sup>   | Canada  | To evaluate the accuracy of drug interaction alerts triggered by two electronic medical record systems in primary healthcare           | Quantitative: modelling study of drug-drug interaction pairs in hypothetical patient scenarios                                                  | Modelling study of medication alerts triggered by two electronic medical record systems in primary healthcare | Computer decision support systems | Consumed time                                                                             |
| <b>Green 2015</b> <sup>4</sup>     | Canada  | To evaluate the application of sound human factors engineering and cognitive science principles in designing a reminder system         | Quantitative: retrospective cohort study                                                                                                        | Five academically affiliated family medicine practices                                                        | Computer decision support systems | Disruption; consumed time                                                                 |

|                                    |    |                                                                                                                                                  |                                                                                                                                                                   |                                                                                                                                                                                       |                                   |                                                                                                                  |
|------------------------------------|----|--------------------------------------------------------------------------------------------------------------------------------------------------|-------------------------------------------------------------------------------------------------------------------------------------------------------------------|---------------------------------------------------------------------------------------------------------------------------------------------------------------------------------------|-----------------------------------|------------------------------------------------------------------------------------------------------------------|
| <b>Hayward 2013</b> <sup>5</sup>   | UK | To understand how primary care physicians interact with prescribing computerised decision support systems                                        | Mixed: quantitative and qualitative analysis of interactions between primary care physicians, patients, and computer systems using multi-channel video recordings | Consultations (n=112) with eight primary care physicians in three UK practices                                                                                                        | Computer decision support systems | Disruption                                                                                                       |
| <b>Hysong 2010</b> <sup>6</sup>    | US | To evaluate how primary care physicians manage alerts related to critical diagnostic test results on their electronic medical record screens     | Qualitative: interviews drawing on cognitive task analysis                                                                                                        | Primary care physicians (n=28) in one large Veterans Affairs Medical Center                                                                                                           | Computer decision support systems | Cognitive burden; required workarounds                                                                           |
| <b>Lapane 2008</b> <sup>7</sup>    | US | To describe primary care prescribers' perspectives on electronic prescribing drug alerts at the point of prescribing                             | Mixed: clinician surveys (web-based and paper) and focus groups with prescribers and staff                                                                        | Prescribers and staff (n=157 for survey, n=276 for focus group) working in 64 practices using 1 of 6 e-prescribing technologies                                                       | Computer decision support systems | Frustration; consumed time                                                                                       |
| <b>Maniam 2014</b> <sup>8</sup>    | US | To understand how physicians respond to computerised decision support alerts and understand their reasons for overriding alerts                  | Qualitative: interviews                                                                                                                                           | Primary care physicians (n=23) with high inappropriate computerized decision support override rates                                                                                   | Computer decision support systems | Disruption; consumed time                                                                                        |
| <b>Militello 2014</b> <sup>9</sup> | US | To identify sources of variation in clinical workflow and implications for the design and implementation of electronic clinical decision support | Qualitative: rapid ethnographic observations of health care providers and support staff; focus groups and interviews with key informants.                         | Health care providers and support staff (n=205) and key informants (n=15) from eight Veterans Health Administration or academic medical centers regarded as leaders in developing and | Computer decision support systems | Requires additional tasks or workarounds; delays task completion; interfered with physician-patient relationship |

|                                      |    |                                                                                                                                |                                                                                                                       |                                                                                                                                                                     |                                   |                                                                      |
|--------------------------------------|----|--------------------------------------------------------------------------------------------------------------------------------|-----------------------------------------------------------------------------------------------------------------------|---------------------------------------------------------------------------------------------------------------------------------------------------------------------|-----------------------------------|----------------------------------------------------------------------|
|                                      |    |                                                                                                                                |                                                                                                                       | using clinical decision support                                                                                                                                     |                                   |                                                                      |
| <b>Murphy 2012</b> <sup>10</sup>     | US | To categorize asynchronous alerts according to the information they conveyed and measure their impact on practitioner workload | Mixed: quantification, categorization and time-motion analysis of asynchronous alerts sent to primary care physicians | Primary care physicians (n=47) at a large, tertiary care Veterans Affairs facility over 4 evenly spaced 28-day periods                                              | Computer decision support systems | Cognitive burden; requires additional tasks; delayed task completion |
| <b>Richardson 2011</b> <sup>11</sup> | US | To elicit community-based physicians' current views on computer decision support and its desired capabilities                  | Qualitative: interviews and observations of primary care physicians                                                   | Primary care providers (n=30 interviews and n=25 observations) in 15 urban and rural community-based clinics using three different electronic health record systems | Computer decision support systems | Frustration; cognitive burden; consumed time                         |
| <b>Russ 2009</b> <sup>12</sup>       | US | To assess barriers associated with the use of medication alerts                                                                | Qualitative: Direct observation of prescribing with inductive analysis of barriers associated with alerts             | Prescribers (n=20) across five primary care clinics at a Veterans Affairs Medical Center                                                                            | Computer decision support systems | Required additional tasks; consumed time; delayed decision-making    |
| <b>Russ 2012</b> <sup>13</sup>       | US | To uncover factors that influence the prescriber–alert interaction and identify strategies to improve alert design             | Qualitative: field observations and interviews                                                                        | Primary care physicians (n=30) in 5 Veterans Affairs Medical Centers                                                                                                | Computer decision support systems | Required additional tasks; consumed time; delayed decision-making    |
| <b>Saleem 2005</b> <sup>14</sup>     | US | To determine barriers and facilitators to the effective use of computerized clinical reminders                                 | Qualitative: observations of staff interacting with computerized clinical                                             | Primary care physicians (n=55) and nurses (35) in four geographically distributed Veterans                                                                          | Computer decision support systems | Consumed time; cognitive burden                                      |

|                                    |    |                                                                                                                                                             |                                                                                                                     |                                                                                                                          |                                   |                                                                               |
|------------------------------------|----|-------------------------------------------------------------------------------------------------------------------------------------------------------------|---------------------------------------------------------------------------------------------------------------------|--------------------------------------------------------------------------------------------------------------------------|-----------------------------------|-------------------------------------------------------------------------------|
|                                    |    |                                                                                                                                                             | reminders in primary care clinics                                                                                   | Administration medical centers                                                                                           |                                   |                                                                               |
| <b>Sittig 2006</b> <sup>15</sup>   | US | To explore potential factors affecting clinician acceptance of clinical decision support at the point of care                                               | Quantitative: survey                                                                                                | Primary care physicians (n=110) within one group model Health Maintenance Organization                                   | Computer decision support systems | Consumed time; cognitive burden                                               |
| <b>Vaziri 2009</b> <sup>16</sup>   | UK | To evaluate the experience of UK primary health care professionals using computer decision support systems                                                  | Mixed: synthesis of literature review, views from experts and stakeholders ascertained at a workshop and interviews | Attendees (n=30) at the Primary Health Care workshop of the British Computer Society healthcare computing conference     | Computer decision support systems | Frustration; interfered with physician-patient relationship; cognitive burden |
| <b>Weingart 2009</b> <sup>17</sup> | US | To study respondents' satisfaction with e-prescribing systems, their perceptions of alerts, and their perceptions of behavior changes resulting from alerts | Quantitative: random sample survey                                                                                  | Ambulatory care clinicians (n=300) who used a commercial e-prescribing system                                            | Computer decision support systems | Consumed time                                                                 |
| <b>Zazove 2017</b> <sup>18</sup>   | US | To explore how family medicine clinicians view, perceive, and use electronic clinical alerts                                                                | Qualitative: interviews drawing on cognitive task analysis                                                          | Primary care physicians (n=23) in two large primary care clinics                                                         | Computer decision support systems | Consumed time; cognitive burden; disruption                                   |
| <b>Agha 2014</b> <sup>19</sup>     | US | To describe associations between primary care clinicians' electronic health record use                                                                      | Quantitative: time-motion study based on video and electronic health record activity capture                        | Primary care physicians (n=21) during primary care office visits (n=111) at four Veterans Administration medical Centers | Electronic health record          | Consumed time; Interfered with physician-patient relationship                 |

|                                       |        |                                                                                                                                                                                               |                                                                                                                               |                                                                                                                                                                                                                                                        |                          |                                                                                 |
|---------------------------------------|--------|-----------------------------------------------------------------------------------------------------------------------------------------------------------------------------------------------|-------------------------------------------------------------------------------------------------------------------------------|--------------------------------------------------------------------------------------------------------------------------------------------------------------------------------------------------------------------------------------------------------|--------------------------|---------------------------------------------------------------------------------|
|                                       |        | patterns and usability, inefficiencies and burdensome workflow                                                                                                                                |                                                                                                                               |                                                                                                                                                                                                                                                        |                          |                                                                                 |
| <b>Al Alawi 2014</b> <sup>20</sup>    | UAE    | To explore physician satisfaction with an electronic medical records system                                                                                                                   | Qualitative: focus groups of 7-9 physicians                                                                                   | Primary care physicians (n=23) purposively sampled from practices                                                                                                                                                                                      | Electronic health record | Required additional tasks; consumed time                                        |
| <b>Baron 2005</b> <sup>21</sup>       | US     | To describe the effects that use of electronic health records has had on practice finances, work flow, and office environment                                                                 | Qualitative: case study and reflective account of practice's experience of implementing a new electronic health record system | A community-based general internal medicine practice with four physicians                                                                                                                                                                              | Electronic health record | Disruption                                                                      |
| <b>Bouamrane 2013</b> <sup>22</sup>   | UK     | To elucidate General Practitioners' perspectives on their practice information systems                                                                                                        | Qualitative: in-depth semi-structured interviews                                                                              | Primary care physicians (n=25) invited from a list held by the NHS Scotland Information Services Division                                                                                                                                              | Electronic health record | Consumed time; cognitive burden; interfered with physician-patient relationship |
| <b>Christensen 2008</b> <sup>23</sup> | Norway | To study primary care physicians' use of electronic patient record systems, the time spent on using the records, and potential effects of these systems on the clinician-patient relationship | Mixed: focus groups, observations of primary care encounters, and a questionnaire survey                                      | Focus groups of primary care physicians (n=23); observations in five practices using different record systems (n=11 primary care physicians in 80 encounters); a random selection of primary care members of the Norwegian Medical Association (n=408) | Electronic health record | Cognitive burden; required workarounds; consumed time; delayed task completion  |
| <b>Cutrona 2017</b> <sup>24</sup>     | US     | To assess electronic health record in-basket management                                                                                                                                       | Mixed: audit and access log of electronic health record data and one focus group                                              | Primary care providers (n=75 for audit, 5 participated in focus group) across a multisite healthcare system                                                                                                                                            | Electronic health record | Consumed time; cognitive burden; dissatisfaction                                |

|                                    |    |                                                                                                                                                           |                                                                                                  |                                                                                                                                |                          |                                                                                                 |
|------------------------------------|----|-----------------------------------------------------------------------------------------------------------------------------------------------------------|--------------------------------------------------------------------------------------------------|--------------------------------------------------------------------------------------------------------------------------------|--------------------------|-------------------------------------------------------------------------------------------------|
| <b>Flanagan 2013</b> <sup>25</sup> | US | To examine both paper- and computer-based workarounds to the use of electronic health record systems                                                      | Qualitative: direct observations and opportunistic questions                                     | Primary care providers and staff (n=120) working at eleven primary care clinics                                                | Electronic health record | Required workarounds                                                                            |
| <b>Friedman 2014</b> <sup>26</sup> | US | To construct a typology of workarounds, including characteristics that distinguish benign or positive workarounds from those that are potentially harmful | Qualitative: comparative case study and ethnography                                              | Seven clinician-owned primary care practices using five different electronic record systems                                    | Electronic health record | Required workarounds; consumed time                                                             |
| <b>Goldberg 2012</b> <sup>27</sup> | US | To understand the current use of electronic health records in small primary care practices                                                                | Qualitative: case study including interviews, observations and survey                            | 6 primary care practice, including physicians and administrative staff (n= 38)                                                 | Electronic health record | Consumed time; disruption; interfered with physician-patient relationship                       |
| <b>Halas 2015</b> <sup>28</sup>    | US | To capture users' experiences with a newly implemented electronic medical record in family medicine academic teaching clinics                             | Qualitative: focus group discussions guided by semi structured questions                         | Three family medicine academic teaching clinics, including physicians (n=9), allied health faculty (n=11), and residents (n=8) | Electronic health record | Consumed time; disruption; interfered with physician-patient relationship; required workarounds |
| <b>Hayward 2015</b> <sup>29</sup>  | UK | To explore how information technology functions affected time allocation and styles of computer use during primary care physicians' consultations         | Qualitative: Analysis of multichannel video recordings of between 12 and 18 10-min consultations | Recordings of 112 consultations with primary care physicians (n=6) purposively recruited from three diverse practices          | Electronic health record | Consumed time; required workarounds                                                             |



|                                    |           |                                                                                                                                                                                     |                                                                                                                                                                                                                      |                                                                                                                                   |                          |                                                                                          |
|------------------------------------|-----------|-------------------------------------------------------------------------------------------------------------------------------------------------------------------------------------|----------------------------------------------------------------------------------------------------------------------------------------------------------------------------------------------------------------------|-----------------------------------------------------------------------------------------------------------------------------------|--------------------------|------------------------------------------------------------------------------------------|
| <b>Howard 2013</b> <sup>30</sup>   | US        | To study the impact of electronic health record use on clinician and staff work burden                                                                                              | Qualitative: observations, interviews, photographic documentation                                                                                                                                                    | All staff and selected patients in seven small, community-based primary care practices                                            | Electronic health record | Required additional tasks; consumed time                                                 |
| <b>Koopman 2015</b> <sup>31</sup>  | US        | To understand how physicians reviewed notes, their perceptions of the most and least important parts of those notes, and how the electronic health record display could be improved | Qualitative: cognitive task analysis with primary care physicians as they prepared for consultations                                                                                                                 | Primary care physicians (n=16) working in university-associated practices                                                         | Electronic health record | Consumed time; cognitive burden; frustration                                             |
| <b>Magrabi 2016</b> <sup>32</sup>  | Australia | To examine the use of information technology in routine general practice by soliciting incidents involving problems with computer systems and associated peripheral devices         | Quantitative: analysis of incident reports from primary care physicians with a focus on problems encountered by primary care physicians in using computers and other information technology in routine clinical work | Primary care physicians (n=87/4000) listed with the Australian Government's Department of Human Services                          | Electronic health record | Consumed time; disruption; frustration                                                   |
| <b>McGeorge 2015</b> <sup>33</sup> | US        | To identify activity changes due to the implementation of electronic health records with varying levels of interoperability                                                         | Qualitative: interviews and observations                                                                                                                                                                             | Primary care physicians (n=16), administrative staff (n=26) and other clinical staff (n=11) at thirteen ambulatory care practices | Electronic health record | Required additional tasks; consumed time; interfered with physician-patient relationship |

|                                    |        |                                                                                                                                                      |                                                                                                                                                                               |                                                                                                                                                                                            |                          |                                 |
|------------------------------------|--------|------------------------------------------------------------------------------------------------------------------------------------------------------|-------------------------------------------------------------------------------------------------------------------------------------------------------------------------------|--------------------------------------------------------------------------------------------------------------------------------------------------------------------------------------------|--------------------------|---------------------------------|
| <b>O'Malley 2015</b> <sup>34</sup> | US     | To identify how electronic health records facilitate and pose challenges to primary care teams                                                       | Qualitative: interviews                                                                                                                                                       | 63 participants including physicians to front-desk staff working in practices (n=27) recognized as patient-centered medical homes                                                          | Electronic health record | Required additional tasks       |
| <b>Samaan 2009</b> <sup>35</sup>   | US     | To assess the impact of electronic health record implementation and subsequent use on documentation, clinical processes, and patient access and flow | Quantitative: routine data analysis from one large clinic at baseline, 6 months and 2 years after electronic health record implementation                                     | A large urban academic pediatric primary care health center                                                                                                                                | Electronic health record | Required additional tasks       |
| <b>Samoutis 2007</b> <sup>36</sup> | Cyprus | To evaluate implementation of an electronic medical record system                                                                                    | Mixed: qualitative interviews at 6 and 18 months after implementation of electronic medical record; quantitative questionnaire and electronic medical record usage parameters | All primary care physicians (n=5) and nurses (n=5) in one urban and one rural healthcare center                                                                                            | Electronic health record | Required additional tasks       |
| <b>Weir 2015</b> <sup>37</sup>     | US     | To explore perceptions on the availability and attributes of contextual information needed for clinical decision-making in electronic health records | Qualitative: interviews using cognitive task analyses and a modified critical incident technique                                                                              | Primary care providers (n=17, 3 physicians) in a large Veterans Administration Medical Center with a fully implemented electronic record and a patient-centered medical home model of care | Electronic health record | Consumed time; cognitive burden |

|                                        |    |                                                                                                                      |                                                                                                                      |                                                                                                                                                                |                       |                                                                   |
|----------------------------------------|----|----------------------------------------------------------------------------------------------------------------------|----------------------------------------------------------------------------------------------------------------------|----------------------------------------------------------------------------------------------------------------------------------------------------------------|-----------------------|-------------------------------------------------------------------|
| <b>Crosson 2011</b> <sup>38</sup>      | US | To identify successful implementation and techniques used for e-prescribing                                          | Mixed: a comparative case study using observation and questionnaires                                                 | Five exemplar e-prescribing practices using different prescribing systems                                                                                      | E-prescribing systems | Required workarounds; consumed time                               |
| <b>Crosson 2012</b> <sup>39</sup>      | US | To evaluate the use of formularies and medication history information provided by two e-prescribing systems          | Qualitative: comparative case study using interviews and observations 3 months after implementation of e-prescribing | Eight early adopter practices (1 to 4 physicians/practice), three months after implementation of stand-alone e-prescribing systems                             | E-prescribing systems | Required workarounds; consumed time                               |
| <b>Devine 2010</b> <sup>40</sup>       | US | To compare prescribing time between handwritten and electronic prescriptions using differing hardware configurations | Quantitative: direct observation, time-motion study                                                                  | Prescribers (n=65) in three primary care clinics in a community-based health system                                                                            | E-prescribing systems | Consumed time                                                     |
| <b>Hollingworth 2007</b> <sup>41</sup> | US | To compare prescribing times at three clinics that used paper-based prescribing, desktop, or laptop e-prescribing    | Quantitative: time and motion                                                                                        | Prescribers (n=27) and other staff (n=42) at three clinics associated with a large healthcare provider                                                         | E-prescribing systems | Consumed time                                                     |
| <b>Jariwala 2013</b> <sup>42</sup>     | US | To describe the experience of primary care physicians with e-prescribing                                             | Quantitative: internet based survey                                                                                  | Convenience sample of primary care physicians (n=443) registered on a physician panel maintained by a private research company                                 | E-prescribing systems | Delayed task completion; required additional tasks; consumed time |
| <b>Lapane 2011</b> <sup>43</sup>       | US | To explore healthcare providers' opinions about the role of e-prescribing applications in improving efficiency       | Mixed: survey and focus groups/ interviews                                                                           | Focus groups of primary care physicians and office staff (n=276) from practices with at least 25% Medicare eligible patients and surveys of physicians (n=157) | E-prescribing systems | Consumed time                                                     |

|                                       |        |                                                                                                                                                       |                                                                                                                 |                                                                                                                                          |                       |                                                                   |
|---------------------------------------|--------|-------------------------------------------------------------------------------------------------------------------------------------------------------|-----------------------------------------------------------------------------------------------------------------|------------------------------------------------------------------------------------------------------------------------------------------|-----------------------|-------------------------------------------------------------------|
| <b>Lichtner 2013</b> <sup>44</sup>    | UK     | To assess the time-related changes conditioned by digital transmission of prescriptions specifically for repeat prescribing                           | Qualitative: field studies using interviews and observations                                                    | Primary care physicians (n=15), practice staff (n=26), and patients (n=12) in four of the first English practices to adopt e-prescribing | E-prescribing systems | Consumed time; required workarounds; cognitive burden;            |
| <b>Tamblyn 2006</b> <sup>45</sup>     | Canada | To evaluate the acceptability and use of an integrated electronic prescribing and drug management system                                              | Quantitative: audit trails, questionnaires, standardized tasks, and information from health insurance databases | Primary care physicians (n=28) working in full-time fee-for-service practice in a large metropolitan area                                | E-prescribing systems | Consumed time; required workarounds                               |
| <b>Weingart 2009</b> <sup>46</sup>    | US     | To understand the reasons for adoption and use of e-prescribing, clinicians' complaints and perceived benefits of drug allergy and interaction alerts | Qualitative: focus groups (n=3) on use and value of e-prescribing and medication safety alerts                  | Primary care physicians (n=25) from a list held by a large insurance provider                                                            | E-prescribing systems | Delayed task completion; required additional tasks                |
| <b>Cohen 2016</b> <sup>47</sup>       | US     | To determine the perceived barriers to meeting the meaningful use care coordination criteria                                                          | Quantitative: survey of primary care practices                                                                  | Random sample of 328 state-wide practices stratified by practice size                                                                    | E-referral systems    | Delayed task completion; required additional tasks; consumed time |
| <b>Kim 2009</b> <sup>48</sup>         | US     | To assess the impact of electronic referrals on workflow and clinical care                                                                            | Quantitative: 18-item, web-based questionnaire                                                                  | All primary care physicians (n=368) who had the option of referring to San Francisco General Hospital                                    | E-referral systems    | Consumed time; delayed task completion                            |
| <b>Vimalananda 2015</b> <sup>49</sup> | US     | To systematically review and summarize the literature describing the use and effects of e-consults                                                    | Review: Narrative synthesis                                                                                     | 27 papers including 22 research studies and five system descriptions                                                                     | E-referral systems    | Required additional tasks; consumed time                          |

|                                      |          |                                                                                                                             |                                                                                                                                                                 |                                                                                                                                                   |                                       |                                        |
|--------------------------------------|----------|-----------------------------------------------------------------------------------------------------------------------------|-----------------------------------------------------------------------------------------------------------------------------------------------------------------|---------------------------------------------------------------------------------------------------------------------------------------------------|---------------------------------------|----------------------------------------|
| <b>Armor 2016</b> <sup>50</sup>      | US       | To evaluate medication discrepancies between hospital discharge and primary care follow-up                                  | Quantitative: retrospective study of medication discrepancies and adverse events                                                                                | Review of patients (n=43) attending on academic family medicine outpatient clinic.                                                                | Information: medication discrepancies | Consumed time                          |
| <b>Redmond 2016</b> <sup>51</sup>    | Ireland  | To survey primary care physicians and community pharmacists on medication reconciliation as patients transition in care     | Quantitative: Survey which included free text responses, analyzed by data-driven content analysis                                                               | Primary care physicians (n=2364), physicians in training (n=311) and community pharmacists (n=2382) invited from lists held on national registers | Information: medication discrepancies | Frustration                            |
| <b>Sellappans 2015</b> <sup>52</sup> | Malaysia | To identify the challenges faced by primary care physicians when prescribing medications for patients with chronic diseases | Qualitative: focus groups                                                                                                                                       | Family medicine trainees (n=14) and service medical officers (n=5) affiliated with a teaching primary care clinic                                 | Information: medication discrepancies | Frustration                            |
| <b>Vuong 2017</b> <sup>53</sup>      | Canada   | To evaluate an intervention to improve the quality of admission medication reconciliation in LTC homes and retirement homes | Quantitative: Plan-Do-Study-Act (PDSA) of an iterative intervention tracking medication-reconciliation quality scores                                           | One inpatient health center, a senior living unit, care home, and pharmacy provider                                                               | Information: medication discrepancies | Consumed time                          |
| <b>Hickner 2008</b> <sup>54</sup>    | US       | To describe types, predictors and outcomes of testing errors reported by family physicians and office staff                 | Quantitative: analysis of anonymous reports of errors related to the testing process, which staff recognized or experienced during the course of their work day | Primary care physicians and office staff (n=243) at a maximum variation sample of eight practices                                                 | Information: test results             | Delayed decision-making; consumed time |

|                                     |             |                                                                                                                                                                  |                                                                                                                                       |                                                                                                                                                       |                           |                                                                         |
|-------------------------------------|-------------|------------------------------------------------------------------------------------------------------------------------------------------------------------------|---------------------------------------------------------------------------------------------------------------------------------------|-------------------------------------------------------------------------------------------------------------------------------------------------------|---------------------------|-------------------------------------------------------------------------|
| <b>Poon 2004</b> <sup>55</sup>      | US          | To identify problems in current test result management systems and possible ways to improve these systems                                                        | Quantitative: survey                                                                                                                  | Physicians (n=262) working in 15 practices affiliated with two large urban teaching hospitals                                                         | Information: test results | Dissatisfaction                                                         |
| <b>Groene 2012</b> <sup>56</sup>    | Spain       | To explore handover practices at discharge                                                                                                                       | Qualitative: interviews with thematic analysis                                                                                        | Primary care physicians (n=7), primary care nurses (4), patients (n=12), and hospital staff (11) at two hospitals and associated primary care centers | Information: continuity   | Delayed decision-making; Interfered with physician-patient relationship |
| <b>Jones 2014</b> <sup>57</sup>     | US          | To understand the challenges in coordination of care from the perspective of hospitalists and primary care physicians                                            | Qualitative: focus groups                                                                                                             | Purposive sample of primary care providers (n = 24), and hospital physicians (n=60) participating in collaboratives to improve care transitions       | Information: continuity   | Required additional tasks; delayed decision-making                      |
| <b>Kljakovic 2004</b> <sup>58</sup> | New Zealand | To describe the transfer of patient information from hospital to general practice                                                                                | Quantitative: analysis and comparison of discharge/ outpatient letters and electronic health records in hospital and general practice | Discharge and outpatient letters for patients registered with primary care physicians (n=12) working in two computerized general practices            | Information: continuity   | Delayed decision-making                                                 |
| <b>Kripalani 2007</b> <sup>59</sup> | US          | To characterize the types and prevalence of deficits in information transfer between hospital-based physicians and primary care physicians at hospital discharge | Review: Systematic review                                                                                                             | Observational (n = 55) and intervention (n = 18) studies investigating communication and information transfer at hospital discharge                   | Information: continuity   | Delayed decision-making; dissatisfaction                                |

|                                          |    |                                                                                                                                                      |                                                                                                                      |                                                                                                                                   |                         |                                                                   |
|------------------------------------------|----|------------------------------------------------------------------------------------------------------------------------------------------------------|----------------------------------------------------------------------------------------------------------------------|-----------------------------------------------------------------------------------------------------------------------------------|-------------------------|-------------------------------------------------------------------|
| <b>Mastellos 2014</b> <sup>60</sup>      | UK | To explore the range, quality and sophistication of existing information systems in primary care to capture what is needed to provide a safe service | Mixed: semi-structured interviews and survey evaluating primary care physicians' experience with information systems | Primary care physicians (n=25) purposively sampled from 15 practices in an Integrated Care Pilot                                  | Information: continuity | Delayed decision-making                                           |
| <b>O'Malley 2009</b> <sup>61</sup>       | US | To identify current best practices in coordination, challenges and lessons learned                                                                   | Qualitative: in-depth interviews of physicians and national experts                                                  | Primary care physicians (n=62) associated with the American College of Physicians and the American Academy of Family Practice     | Information: continuity | Required workarounds                                              |
| <b>Smith 2005</b> <sup>62</sup>          | US | To describe primary care clinicians' reports of missing clinical information                                                                         | Quantitative: cross-sectional survey                                                                                 | Primary care physicians (n=253) surveyed about patient visits (n=1614) at 32 practices in a "Improving Patient Safety" consortium | Information: continuity | Consumed time; required additional tasks; delayed decision-making |
| <b>Matthews- King 2016</b> <sup>63</sup> | UK | To reveal the administrative challenges primary care physicians face in England                                                                      | Quantitative: survey                                                                                                 | 500 primary care physicians and practice managers                                                                                 | Materials and supplies  | Disruptions                                                       |
| <b>Varkey 2009</b> <sup>64</sup>         | US | To determine differences in workplace organizational characteristics, among clinics serving various proportions of minority patients                 | Quantitative: secondary analysis of data from the observational Minimizing Error Maximizing Outcome (MEMO) study     | Surveys of clinic managers (n=96), primary care physicians (n=388), and adult patients (n=1701) from 96 primary care clinics      | Materials and supplies  | Disruptions                                                       |
| <b>Varkey 2013</b> <sup>65</sup>         | US | To assess associations between the work environment, errors and quality among clinics serving various                                                | Quantitative: secondary analysis of chart audit data from the observational Minimizing Error                         | Primary care physicians (n=287) and patients (n=1207) in 73 clinics with >=30% minority patients                                  | Materials and supplies  | Disruptions                                                       |

|                                     |    |                                                                                                                                           |                                                                         |                                                                                                                                                |                                                                     |                                                               |
|-------------------------------------|----|-------------------------------------------------------------------------------------------------------------------------------------------|-------------------------------------------------------------------------|------------------------------------------------------------------------------------------------------------------------------------------------|---------------------------------------------------------------------|---------------------------------------------------------------|
|                                     |    | proportions of minority patients                                                                                                          | Maximizing Outcome (MEMO) study                                         | versus <30% minority patients                                                                                                                  |                                                                     |                                                               |
| <b>Hoonakker 2017</b> <sup>66</sup> | US | To examine the impact of secure messaging on workflow of clinicians, staff and patients                                                   | Mixed: case study design with observation, interviews and survey        | Physicians (n=39 interviews /observations, n=43 surveys) and other staff (n=13 interviews /observations, n=15 surveys) in five urban practices | Practice organization: systems to support interaction with patients | Consumed time; requires additional tasks and workarounds      |
| <b>Kravitz 2000</b> <sup>67</sup>   | US | To determine the association of limited English proficiency with visit time, health care resource utilization, and adherence to follow-up | Quantitative: time-motion study with quantitative analysis              | Patient consultations (n=285) at three clinics where 10-15% of registered patients require interpretive assistance                             | Practice organization: systems to support interaction with patients | Consumed time; Interfered with physician-patient relationship |
| <b>Ozkaynak 2014</b> <sup>68</sup>  | US | To explore secure messaging implementation at two Veterans Health Administration facilities                                               | Qualitative: semi-structured interviews                                 | Primary care providers (n=29) in eight primary care teams                                                                                      | Practice organization: systems to support interaction with patients | Consumed time; requires additional tasks                      |
| <b>Baron 2010</b> <sup>69</sup>     | US | To count units of primary care work including non-patient visit work during the course of a year                                          | Qualitative: case study                                                 | Primary care physicians (n=5) at a community-based practice                                                                                    | Practice organization                                               | Required additional tasks and workarounds                     |
| <b>Best 2006</b> <sup>70</sup>      | US | To identify overlap in task performance among multiple primary care occupational groups                                                   | Mixed: qualitative focus groups and quantitative survey data collection | Representatives of each primary care worker from six practices manifesting diverse organizational characteristics                              | Practice organization                                               | Required additional tasks; consumed time                      |



|                                    |    |                                                                                                                                                             |                                                                                                                                                                                   |                                                                                                            |                       |                                                               |
|------------------------------------|----|-------------------------------------------------------------------------------------------------------------------------------------------------------------|-----------------------------------------------------------------------------------------------------------------------------------------------------------------------------------|------------------------------------------------------------------------------------------------------------|-----------------------|---------------------------------------------------------------|
| <b>Brazil 2010</b> <sup>71</sup>   | US | To examine the relationship of organizational culture on provider job satisfaction and perceived clinical effectiveness in primary care pediatric practices | Quantitative: cross-sectional, secondary analysis of trial data that compared practitioner-versus organization-focused interventions designed to enhance guideline implementation | Physicians (n=127) and non-clinicians (n=247) in 36 primary care pediatric practices                       | Practice organization | Dissatisfaction                                               |
| <b>Chesluk 2010</b> <sup>72</sup>  | US | To examine how the entire primary care practice team works together in the course of caring for patients                                                    | Qualitative: ethnography                                                                                                                                                          | Three primary care practices representing different practice types                                         | Practice organization | Required additional work; consumed time; dissatisfaction      |
| <b>Chisholm 2001</b> <sup>73</sup> | US | To determine the number of interruptions and characterize tasks performed in emergency departments versus primary care offices                              | Quantitative: time-motion task-analysis: single observer followed participants and recorded tasks in 1-minute increments                                                          | Primary care (n=22) and emergency physicians (n=22) from 22 primary care offices and 5 community hospitals | Practice organization | Interruptions; dissatisfaction                                |
| <b>Crabtree 2011</b> <sup>74</sup> | US | To understand organizational change in primary care practices emphasizing a complexity science perspective                                                  | Mixed: narrative review of multimethod observational and intervention studies that informed each other in an emergent design                                                      | Over 350 primary care practices                                                                            | Practice organization | Frustration; requires additional tasks                        |
| <b>Dearden 1996</b> <sup>75</sup>  | UK | To discover the patients' view of interruptions                                                                                                             | Quantitative: primary care physician recorded interruptions of own consultations                                                                                                  | Consultations (n=619) at one urban general practice                                                        | Practice organization | Interruptions; interfered with physician-patient relationship |

|                                   |           |                                                                                                                                |                                                                                                                                |                                                                                                            |                                                    |                                                               |
|-----------------------------------|-----------|--------------------------------------------------------------------------------------------------------------------------------|--------------------------------------------------------------------------------------------------------------------------------|------------------------------------------------------------------------------------------------------------|----------------------------------------------------|---------------------------------------------------------------|
| <b>Elmore 2016</b> <sup>76</sup>  | UK        | To examine the relationship between consultation length and patient-reported communication, trust and confidence in the doctor | Qualitative: video-recordings of face-to-face consultations                                                                    | Consultations (n=440) with primary care physicians (n=45) in thirteen purposively sampled practices        | Practice organization                              | Interruptions; interfered with physician-patient relationship |
| <b>Herring 2009</b> <sup>77</sup> | UK        | To test an organizational improvement approach in a general practice setting                                                   | Qualitative: case study                                                                                                        | Three general practices recruited by the National Health Service                                           | Practice organization                              | Consumed time; delayed decision-making                        |
| <b>Holman 2016</b> <sup>78</sup>  | US        | To evaluate the workflow of physician tasks that occur during face-to-face consultations                                       | Mixed: direct observation of the entire patient visit; task-level recording; post-observation primary care physician interview | Primary care physicians (n=10) from ten randomly chosen clinics                                            | Practice organization and electronic health record | Requires additional tasks and workarounds; consumed time      |
| <b>Hung 2017</b> <sup>79</sup>    | US        | To examine a wide range of performance outcomes after implementation of Lean methodology                                       | Quantitative: stepped wedge design with analysis of workflow, productivity, costs, clinical quality, and satisfaction          | Primary care physicians (n=328) in 46 primary care departments in an ambulatory care delivery system       | Practice organization                              | Consumed time; dissatisfaction                                |
| <b>James 2015</b> <sup>80</sup>   | US        | To better understand the sources of and remedies for non-clinical inefficiency in primary care                                 | Mixed: practice information surveys, practice process mapping guides and observations                                          | 5 practices from research network and 8 practices in a medical management association                      | Practice organization                              | Frustration; required additional tasks                        |
| <b>Koong 2015</b> <sup>81</sup>   | Singapore | To understand the impact of unplanned phone calls during primary health care consultations                                     | Qualitative: focus groups with patients and healthcare workers (n=16)                                                          | Physicians, nurses and pharmacists (n=16) and patients (n=15) at one public primary healthcare institution | Practice organization                              | Interruptions; frustration                                    |

|                                      |         |                                                                                                                               |                                                                                                                                                                                                                                   |                                                                                                      |                       |                 |
|--------------------------------------|---------|-------------------------------------------------------------------------------------------------------------------------------|-----------------------------------------------------------------------------------------------------------------------------------------------------------------------------------------------------------------------------------|------------------------------------------------------------------------------------------------------|-----------------------|-----------------|
| <b>Kumarapeli 2013</b> <sup>82</sup> | UK      | To explore the context and use of electronic record systems to provide insights into improving their use in clinical practice | Qualitative: multi-channel visual study of the consultation room and coded interactions between clinician, patient, and computer                                                                                                  | Consultations (n=163) with primary care physicians (n=16) in eleven general practice surgeries       | Practice organization | Interruptions   |
| <b>Linzer 2009</b> <sup>83</sup>     | US      | To assess the relationship among adverse primary care work conditions, adverse physician reactions and patient care.          | Quantitative: surveys and chart audits measuring physician perception of clinic workflow, work control, organizational culture, physician satisfaction, stress, burnout, intent to leave practice, health care quality and errors | Primary care physicians (n=422) and adult patients (n=1795) at 119 diverse ambulatory clinics        | Practice organization | Dissatisfaction |
| <b>Linzer 2015</b> <sup>84</sup>     | US      | To assess if improvements in work conditions improve clinician stress and burnout                                             | Quantitative: cluster randomized controlled trial                                                                                                                                                                                 | Primary care physicians (n=135) at 34 diverse clinics                                                | Practice organization | Dissatisfaction |
| <b>Linzer 2017</b> <sup>85</sup>     | US      | To better understand how clinicians' job satisfaction relates to work conditions and outcomes for clinicians and patients     | Quantitative: secondary analysis of data from a cluster randomized trial                                                                                                                                                          | Primary care physicians (n=146) and advanced practice providers (n=22) in 34 diverse clinics         | Practice organization | Dissatisfaction |
| <b>O'Connor 2007</b> <sup>86</sup>   | Ireland | To determine the frequency and source of consultation interruption                                                            | Quantitative: two medical observers recorded all interruptions during consultations on a paper data sheet                                                                                                                         | Primary care physicians (n=20) randomly selected from lists of all physicians practicing in the city | Practice organization | Interruptions   |

|                                      |        |                                                                                                                 |                                                                                                                       |                                                                                                                               |                       |                                          |
|--------------------------------------|--------|-----------------------------------------------------------------------------------------------------------------|-----------------------------------------------------------------------------------------------------------------------|-------------------------------------------------------------------------------------------------------------------------------|-----------------------|------------------------------------------|
| <b>Paxton 1996</b> <sup>87</sup>     | UK     | To compare the rate and perceptions of interruptions experienced by practice nurses and primary care physicians | Quantitative: self-recording of information on all surgery consultations on one day in every 15 over one year         | Primary care physicians (n=85) representing a cross-section of single-handed doctors and those working in group practices     | Practice organization | Interruptions                            |
| <b>Peleg 2000</b> <sup>88</sup>      | Israel | To characterize interruptions to the patient-physician encounter                                                | Quantitative: primary care physicians self-recorded interruptions of consultations                                    | Primary care physicians (n=4) in one clinic                                                                                   | Practice organization | Interruptions                            |
| <b>Perez 2017</b> <sup>89</sup>      | US     | To determine how chaos in the clinic was associated with work conditions and quality of care measures           | Quantitative: secondary analysis of surveys and chart audits in the Minimizing Error, Maximizing Outcome (MEMO) study | Primary care physicians (n=413) and patients (n=1751) at 112 diverse clinics                                                  | Practice organization | Dissatisfaction                          |
| <b>Rhoades 2001</b> <sup>90</sup>    | US     | To examine physician-patient communication patterns and interruptions during consultations                      | Quantitative: analysis of interruptions observed during 60 routine primary care office consultations                  | Routine consultations (n=60) by a convenience sample of patients (n=22) at a primary care teaching clinic                     | Practice organization | Interruptions                            |
| <b>Shipman 2013</b> <sup>91</sup>    | US     | To demonstrate the potential of reducing waste and inefficiency                                                 | Review: narrative evidence review                                                                                     | Review of the evidence of time-consuming, inefficient activities that can diminish the capacity of the primary care workforce | Practice organization | Consumed time; required additional tasks |
| <b>Shvartzman 1992</b> <sup>92</sup> | Israel | To determine the number and nature of interruptions to consultations                                            | Quantitative: observation of consultations with counting of interruptions                                             | Primary care physicians (n=4) in one neighborhood health center                                                               | Practice organization | Interruptions                            |

|                                   |         |                                                                                                                  |                                             |                                                                                                                             |                       |                           |
|-----------------------------------|---------|------------------------------------------------------------------------------------------------------------------|---------------------------------------------|-----------------------------------------------------------------------------------------------------------------------------|-----------------------|---------------------------|
| <b>Sinnott 2013</b> <sup>93</sup> | Ireland | To review primary care physicians' perceptions on the clinical management of multimorbidity                      | Qualitative:<br>Meta-ethnography            | Systematic review of ten qualitative studies that explored physicians' experiences of clinical management of multimorbidity | Practice organization | Required additional tasks |
| <b>Sinsky 2013</b> <sup>94</sup>  | US      | To highlight primary care innovations gathered from high-functioning primary care practices                      | Qualitative:<br>Observations and interviews | 23 high-performing primary care practices in the US                                                                         | Practice organization | Dissatisfaction           |
| <b>Stroebe 2005</b> <sup>95</sup> | US      | To describe an improvement process based on the understanding primary care practices as complex adaptive systems | Qualitative:<br>Case study                  | One two-physician and one-nurse practice in the North East US                                                               | Practice organization | Consumed time             |

## 1.6 References

1. Curry L, Reed MH. Electronic decision support for diagnostic imaging in a primary care setting. *Journal of the American Medical Informatics Association* 2011; **18**(3): 267-70.
2. Feldstein A, Simon SR, Schneider J, et al. How to design computerized alerts to safe prescribing practices. *Jt Comm J Qual Saf* 2004; **30**(11): 602-13.
3. Gaikwad R, Sketris I, Shepherd M, Duffy J. Evaluation of accuracy of drug interaction alerts triggered by two electronic medical record systems in primary healthcare. *Health Informatics Journal* 2007; **13**(3): 163-77.
4. Green LA, Nease D, Klinkman MS. Clinical reminders designed and implemented using cognitive and organizational science principles decrease reminder fatigue. *Journal of the American Board of Family Medicine* 2015; **28**(3): 351-9.
5. Hayward J, Thomson F, Milne H, et al. Too much, too late': Mixed methods multi-channel video recording study of computerized decision support systems and GP prescribing. *Journal of the American Medical Informatics Association* 2013; **20**(E1): e76-e84.
6. Hysong SJ, Sawhney MK, Wilson L, et al. Provider management strategies of abnormal test result alerts: a cognitive task analysis. *J Am Med Inform Assoc* 2010; **17**(1): 71-7.
7. Lapane KL, Waring ME, Schneider KL, Dube C, Quilliam BJ. A mixed method study of the merits of e-prescribing drug alerts in primary care. *J Gen Intern Med* 2008; **23**(4): 442-6.
8. Maniam N, Slight SP, Seger DL, et al. An evaluation of computerized medication alert override behavior in ambulatory care. *J Gen Intern Med* 2014; **29**: S20.
9. Militello LG, Arbuckle NB, Saleem JJ, et al. Sources of variation in primary care clinical workflow: implications for the design of cognitive support. *Health Informatics Journal* 2014; **20**(1): 35-49.
10. Murphy DR, Reis B, Sittig DF, Singh H. Notifications received by primary care practitioners in electronic health records: A taxonomy and time analysis. *American Journal of Medicine* 2012; **125**(2): 209.e1-e7.
11. Richardson JE, Ash JS. A clinical decision support needs assessment of community-based physicians. *Journal of the American Medical Informatics Association* 2011; **18**(SUPPL. 1): 28-35.
12. Russ AL, Zillich AJ, McManus MS, Doebbeling BN, Saleem JJ. A human factors investigation of medication alerts: barriers to prescriber decision-making and clinical workflow. *AMIA Annu Symp Proc* 2009; **2009**: 548-52.
13. Russ AL, Zillich AJ, McManus MS, Doebbeling BN, Saleem JJ. Prescribers' interactions with medication alerts at the point of prescribing: A multi-method, in situ investigation of the human-computer interaction. *Int J Med Inform* 2012; **81**(4): 232-43.
14. Saleem JJ, Patterson ES, Militello L, Render ML, Orshansky G, Asch SM. Exploring barriers and facilitators to the use of computerized clinical reminders. *Journal of the American Medical Informatics Association* 2005; **12**(4): 438-47.
15. Sittig DF, Krall MA, Dykstra RH, Russell A, Chin HL. A survey of factors affecting clinician acceptance of clinical decision support. *BMC Med Inform Decis Mak* 2006; **6** (no pagination)(6).
16. Vaziri A, Connor E, Shepherd I, Jones RT, Chan T, de Lusignan S. Are we setting about improving the safety of computerised prescribing in the right way? A workshop report. *Inform Prim Care* 2009; **17**(3): 175-82.
17. Weingart SN, Simchowitz B, Shiman L, et al. Clinicians' assessments of electronic medication safety alerts in ambulatory care. *Arch Intern Med* 2009; **169**(17): 1627-32.

18. Zazove P, McKee M, Schleicher L, et al. To act or not to act: Responses to electronic health record prompts by family medicine clinicians. *Journal of the American Medical Informatics Association* 2017; **24**(2): 275-80.
19. Agha Z, Calvitti A, Ashfaq S, et al. Ehr usability burden and its impact on primary care providers workflow. *J Gen Intern Med* 2014; **29**: S82-S3.
20. Al Alawi S, Al Dhaheri A, Al Baloushi D, Al Dhaheri M, Prinsloo EAM. Physician user satisfaction with an electronic medical records system in primary healthcare centres in Al Ain: A qualitative study. *BMJ Open* 2014; **4** (11) (no pagination)(e005569).
21. Baron RJ, Fabens EL, Schiffman M, Wolf E. Electronic health records: Just around the corner? Or over the cliff? *Ann Intern Med* 2005; **143**(3): 222-6.
22. Bouamrane MM, Mair FS. A study of general practitioners' perspectives on electronic medical records systems in NHSScotland. *BMC Med Inform Decis Mak* 2013; **13**: 58.
23. Christensen T, Grimsmo A. Instant availability of patient records, but diminished availability of patient information: a multi-method study of GP's use of electronic patient records. *BMC Med Inform Decis Mak* 2008; **8**: 12.
24. Cutrona SL, Burns L, Fouayzi H, et al. It takes your whole life over-PCP perspectives on electronic in basket notifications. *J Gen Intern Med* 2017; **32** (2 Supplement 1): S236.
25. Flanagan ME, Saleem JJ, Millitello LG, Russ AL, Doebbeling BN. Paper- and computer-based workarounds to electronic health record use at three benchmark institutions. *J Am Med Inform Assoc* 2013; **20**(e1): e59-66.
26. Friedman A, Crosson JC, Howard J, et al. A typology of electronic health record workarounds in small-to-medium size primary care practices. *Journal of the American Medical Informatics Association* 2014; **21**(E2): e78-e83.
27. Goldberg DG, Kuzel AJ, Feng LB, DeShazo JP, Love LE. EHRs in primary care practices: Benefits, challenges, and successful strategies. *American Journal of Managed Care* 2012; **18**(2): e48-e54.
28. Halas G, Singer A, Styles C, Katz A. New conceptual model of EMR implementation in interprofessional academic family medicine clinics. *Canadian family physician Medecin de famille canadien* 2015; **61**(5): e232-9.
29. Hayward J, Buckingham S, Thomson F, et al. "How long does it take?" A mixed methods evaluation of computer-related work in GP consultations. *Journal of Innovation in Health Informatics* 2015; **22**(4): 409-25.
30. Howard J, Clark EC, Friedman A, et al. Electronic health record impact on work burden in small, unaffiliated, community-based primary care practices. *J Gen Intern Med* 2013; **28**(1): 107-13.
31. Koopman RJ, Steege LMB, Moore JL, et al. Physician information needs and electronic health records (EHRs): Time to reengineer the clinic note. *Journal of the American Board of Family Medicine* 2015; **28**(3): 316-23.
32. Magrabi F, Liaw ST, Arachi D, Runciman W, Coiera E, Kidd MR. Identifying patient safety problems associated with information technology in general practice: An analysis of incident reports. *BMJ quality & safety* 2016; **25**(11): 870-80.
33. McGeorge NM, Hegde S, Guarrera TK, et al. Studying the impact of interoperable electronic health records on workflow in ambulatory care. *International Journal of Industrial Ergonomics* 2015; **49**: 144-55.
34. O'Malley AS, Draper K, Gourevitch R, Cross DA, Scholle SH. Electronic health records and support for primary care teamwork. *Journal of the American Medical Informatics Association* 2015; **22**(2): 426-34.
35. Samaan ZM, Klein MD, Mansour ME, DeWitt TG. The impact of the electronic health record on an academic pediatric primary care center. *J Ambul Care Manage* 2009; **32**(3): 180-7.
36. Samoutis G. Implementation of an electronic medical record system in previously computer-naive primary care centres: a pilot study from Cyprus. *Inform Prim Care* 2007; **15**(4).

37. Weir CR, Stagers N, Gibson B, Doing-Harris K, Barrus R, Dunlea R. A qualitative evaluation of the crucial attributes of contextual information necessary in EHR design to support patient-centered medical home care. *BMC Med Inform Decis Mak* 2015; **15**: 30.
38. Crosson JC, Etz RS, Wu S, Straus SG, Eisenman D, Bell DS. Meaningful use of electronic prescribing in 5 exemplar primary care practices. *Ann Fam Med* 2011; **9**(5): 392-7.
39. Crosson JC, Schueth AJ, Isaacson N, Bell DS. Early adopters of electronic prescribing struggle to make meaningful use of formulary checks and medication history documentation. *Journal of the American Board of Family Medicine* 2012; **25**(1): 24-32.
40. Devine EB. Electronic prescribing at the point of care : A time-motion study in the primary care setting. *Health Serv Res* 2010.
41. Hollingworth W, Devine EB, Hansen RN, et al. The Impact of e-Prescribing on Prescriber and Staff Time in Ambulatory Care Clinics: A Time-Motion Study. *Journal of the American Medical Informatics Association* 2007; **14**(6): 722-30.
42. Jariwala KS, Holmes ER, Banahan BF, 3rd, McCaffrey DJ, 3rd. Adoption of and experience with e-prescribing by primary care physicians. *Research in social & administrative pharmacy : RSAP* 2013; **9**(1): 120-8.
43. Lapane KL, Rosen RK, Dube C. Perceptions of e-prescribing efficiencies and inefficiencies in ambulatory care. *International Journal of Medical Informatics* 2011; **80**(1): 39-46.
44. Lichtner V, Venters W, Hibberd R, Cornford T, Barber N. The fungibility of time in claims of efficiency: The case of making transmission of prescriptions electronic in English general practice. *International Journal of Medical Informatics* 2013; **82**(12): 1152-70.
45. Tamblyn R, Huang A, Kawasumi Y, et al. The development and evaluation of an integrated electronic prescribing and drug management system for primary care. *J Am Med Inform Assoc* 2006; **13**(2): 148-59.
46. Weingart SN, Massagli M, Cyrulik A, et al. Assessing the value of electronic prescribing in ambulatory care: a focus group study. *Int J Med Inform* 2009; **78**(9): 571-8.
47. Cohen GR, Adler-Milstein J. Meaningful use care coordination criteria: Perceived barriers and benefits among primary care providers. *Journal of the American Medical Informatics Association* 2016; **23**(e1): e146-e51.
48. Kim Y, Chen AH, Keith E, Yee Jr HF, Kushel MB. Not perfect, but better: Primary care providers' experiences with electronic referrals in a safety net health system. *J Gen Intern Med* 2009; **24**(5): 614-9.
49. Vimalananda VG, Gupte G, Seraj SM. Electronic consultations (e-consults) to improve access to specialty care : a systematic review and narrative synthesis. *Journal of Telemedicine and Telecare* 2015; **21**(6): 323-30.
50. Armor BL, Wight AJ, Carter SM. Evaluation of Adverse Drug Events and Medication Discrepancies in Transitions of Care Between Hospital Discharge and Primary Care Follow-Up. *Journal of pharmacy practice* 2016; **29**(2): 132-7.
51. Redmond P, Carroll H, Grimes T, et al. GPs' and community pharmacists' opinions on medication management at transitions of care in Ireland. *Fam Pract* 2016; **33**(2): 172-8.
52. Sellappans R, Lai PS, Ng CJ. Challenges faced by primary care physicians when prescribing for patients with chronic diseases in a teaching hospital in Malaysia: a qualitative study. *BMJ Open* 2015; **5**(8): e007817.
53. Vuong V, O'Donnell D, Navare H, et al. BOOMR: Better Coordinated Cross-Sectoral Medication Reconciliation for Residential Care. *Healthc Q* 2017; **20**(1): 34-9.
54. Hickner J, Graham DG, Elder NC, et al. Testing process errors and their harms and consequences reported from family medicine practices: a study of the American Academy of Family Physicians National Research Network. *Qual Saf Health Care* 2008; **17**(3): 194-200.
55. Poon EG, Gandhi TK, Sequist TD, Murff HJ, Karson AS, Bates DW. "I wish i had seen this test result earlier!": Dissatisfaction with test result management systems in primary care. *Arch Intern Med* 2004; **164**(20): 2223-8.



56. Groene RO, Orrego C, Sunol R, Barach P, Groene O. "It's like two worlds apart": an analysis of vulnerable patient handover practices at discharge from hospital. *BMJ quality & safety* 2012; **21 Suppl 1**: i67-75.
57. Jones CD, Vu MB, O'Donnell C, et al. A failure to communicate: Challenges and solutions to care coordination between hospitalists and primary care providers around hospitalizations. *J Gen Intern Med* 2014; **29**: S8.
58. Kljakovic M, Abernethy D, de Ruiter I. Quality of diagnostic coding and information flow from hospital to general practice. *Inform Prim Care* 2004; **12**(4): 227-34.
59. Kripalani S, LeFevre F, Phillips CO, Williams MV, Basaviah P, Baker DW. Deficits in communication and information transfer between hospital-based and primary care physicians: implications for patient safety and continuity of care. *Jama* 2007; **297**(8): 831-41.
60. Mastellos N, Car J, Majeed A, Aylin P. Using information to deliver safer care: a mixed-methods study exploring general practitioners' information needs in North West London primary care. *J Innov Health Inform* 2014; **22**(1): 207-13.
61. O'Malley AS, Tynan A, Cohen GR, Kemper N, Davis MM. Coordination of care by primary care practices: strategies, lessons and implications. *Research brief* 2009; (12): 1-16.
62. Smith PC, Araya-Guerra R, Bublitz C, et al. Missing clinical information during primary care visits. *Journal of the American Medical Association* 2005; **293**(5): 565-71.
63. Matthews-King A. Disruption reported by GP practices since April. *Pulse* 2016.
64. Varkey AB, Manwell LB, Williams ES, et al. Separate and unequal: clinics where minority and nonminority patients receive primary care. *Arch Intern Med* 2009; **169**(3): 243-50.
65. Varkey AB, Manwell LB, Ibrahim SA, et al. Impact of work conditions on errors and quality: A comparison of primary care clinics serving large proportions of minority patients to those that do not. *J Gen Intern Med* 2013; **28**: S100.
66. Hoonakker PLT, Carayon P, Cartmill RS. The impact of secure messaging on workflow in primary care: Results of a multiple-case, multiple-method study. *International Journal of Medical Informatics* 2017; **100**: 63-76.
67. Kravitz RL, Helms LJ, Azari R, Antonius D, Melnikow J. Comparing the use of physician time and health care resources among patients speaking English, Spanish, and Russian. *Medical Care* 2000; **38**(7): 728-38.
68. Ozkaynak M, Johnson S, Shimada S, et al. Examining the Multi-level Fit between Work and Technology in a Secure Messaging Implementation. *AMIA Annu Symp Proc* 2014: 954-62.
69. Baron RJ. What's keeping us so busy in primary care? A snapshot from one practice. *N Engl J Med* 2010; **362**(17): 1632-6.
70. Best RE, Hysong SJ, Pugh JA, Ghosh S, Moore FI. Task Overlap Among Primary Care Team Members: An Opportunity for System Redesign? *Journal of Healthcare Management* 2006; **51**(5): 295-306.
71. Brazil K, Wakefield DB, Cloutier MM, Tennen H, Hall CB. Organizational culture predicts job satisfaction and perceived clinical effectiveness in pediatric primary care practices. *Health Care Manage Rev* 2010; **35**(4): 365-71.
72. Chesluk BJ, Holmboe ES. How teams work--or don't--in primary care: a field study on internal medicine practices. *Health affairs (Project Hope)* 2010; **29**(5): 874-9.
73. Chisholm CD, Dornfeld AM, Nelson DR, Cordell WH. Work interrupted: A comparison of workplace interruptions in emergency departments and primary care offices. *Annals of Emergency Medicine* 2001; **38**(2): 146-51.
74. Crabtree BF, Nutting PA, Miller WL, et al. Primary care practice transformation is hard work: insights from a 15-year developmental program of research. *Med Care* 2011; **49 Suppl**: S28-35.
75. Dearden A. Interruptions during general practice consultations : the patients' view. *Family Pract* 1996: 166-9.

76. Elmore N, Burt J, Abel G, et al. Investigating the relationship between consultation length and patient experience: a cross-sectional study in primary care. *Br J Gen Pract* 2016; **66**(653): e896-e903.
77. Herring L. Lean experience in primary care. *Qual Prim Care* 2009; **17**(4): 271-5.
78. Holman GT, Beasley JW, Karsh BT, Stone JA, Smith PD, Wetterneck TB. The myth of standardized workflow in primary care. *Journal of the American Medical Informatics Association* 2016; **23**(1): 29-37.
79. Hung DY, Harrison MI, Martinez MC, Luft HS. Scaling lean in primary care: Impacts on system performance. *American Journal of Managed Care* 2017; **23**(3): 161-8.
80. James KA, Ross SE, Vance B, Nath R, Harrison MI, West DR. Inefficiency in primary care: common causes and potential solutions. *Family practice management* 2015; **22**(2): 18-22.
81. Koong AY, Koot D, Eng SK, et al. When the phone rings - factors influencing its impact on the experience of patients and healthcare workers during primary care consultation: a qualitative study. *BMC Fam Pract* 2015; **16**: 114.
82. Kumarapeli P, De Lusignan S. Using the computer in the clinical consultation; setting the stage, reviewing, recording, and taking actions: Multi-channel video study. *Journal of the American Medical Informatics Association* 2013; **20**(E1): e67-e75.
83. Linzer M, Manwell LB, Williams ES, et al. Working conditions in primary care: Physician reactions and care quality. *Ann Intern Med* 2009; **151**(1): 28-36.
84. Linzer M, Poplau S, Grossman E, et al. A Cluster Randomized Trial of Interventions to Improve Work Conditions and Clinician Burnout in Primary Care: Results from the Healthy Work Place (HWP) Study. *J Gen Intern Med* 2015; **30**(8): 1105-11.
85. Linzer M, Poplau S, Brown R, et al. Do Work Condition Interventions Affect Quality and Errors in Primary Care? Results from the Healthy Work Place Study. *J Gen Intern Med* 2017; **32**(1): 56-61.
86. O'Connor R, Barry N, Dempsey R. Interruptions in general practice. *Irish medical journal* 2007; **100**(9).
87. Paxton F. A study of interruption rates for practice nurses and GPs. *Nursing Standard* 1996; **10**(43).
88. Peleg R, Froimovici M, Peleg A, et al. Interruptions to the physician-patient encounter: An intervention program. *Israel Medical Association Journal* 2000; **2**(7): 520-2.
89. Perez HR, Beyrouty M, Bennett K, et al. Chaos in the Clinic: Characteristics and Consequences of Practices Perceived as Chaotic. *Journal for healthcare quality : official publication of the National Association for Healthcare Quality* 2017; **39**(1): 43-53.
90. Rhoades DR, McFarland KF, Finch WH, Johnson AO. Speaking and interruptions during primary care office visits. *Family Medicine* 2001; **33**(7): 528-32.
91. Shipman SA, Sinsky CA. Expanding primary care capacity by reducing waste and improving the efficiency of care. *Health Affairs* 2013; **32**(11): 1990-7.
92. Shvartzman P, Antonovsky A. The interrupted consultation. *Family Pract* 1992; **9**(2): 219-21.
93. Sinnott C, Mc Hugh S, Browne J, Bradley C. GPs' perspectives on the management of patients with multimorbidity: systematic review and synthesis of qualitative research. *BMJ Open* 2013; **3**(9): e003610.
94. Sinsky CA, Willard-Grace R, Schutzbank AM, Sinsky TA, Margolius D, Bodenheimer T. In search of joy in practice: a report of 23 high-functioning primary care practices. *Ann Fam Med* 2013; **11**(3): 272-8.
95. Stroebel CK, McDaniel RR, Crabtree BF, Miller WL, Nutting PA, Stange KC. How Complexity Science Can Inform a Reflective Process for Improvement in Primary Care Practices. *The Joint Commission Journal on Quality and Patient Safety* 2005; **31**(8): 438-46.
